# Supplementary material for: Effectiveness of non-lethal predator deterrents to reduce livestock losses to leopard attacks within a multiple-use landscape of the Himalayan region
Source: PeerJ. 2020 Jul 24;8:e9544. doi: 10.7717/peerj.9544 (PMC7384438; doi:10.7717/peerj.9544)
Supplement: Supplemental Information 5 [file peerj-08-9544-s005.xlsx]

## Sheet: 500 m-radii
Village	Altitude(m)	NightLight	Area of NonForest (sq.m)	Area of scrub (sq.m)	Area of OpenForest (sq.m)	Area of Moderate Dense Forest (sq.m)	Area of Very Dense Forest (sq.m)	Livestock killed	Deterrent	Leopard sign	Livestock killed during Day	Livestock killed during night	Type of livestock
Maletha_1	1672	0	550000	40000	30000	0	140000	1	Yes	2	0	1	Calf
Maletha_2	1565	7	680000	0	80000	0	0	0	Yes	0	2	0	Goats
Maletha_3	1570	7	560000	0	0	0	0	1	Yes	1	0	1	Calf
Ucchakot_4	1642	7	430000	10000	80000	220000	40000	0	Yes	1	2	0	Goats
Ucchakot_5	1478	7	310000	0	120000	0	0	1	Yes	0	0	1	Cow
Ucchakot_6	1642	0	40000	0	20000	30000	60000	1	Yes	0	0	1	Cow
Panchur_7	1270	7	780000	0	0	0	0	0	Yes	2	2	0	Goats
Panchur_8	1270	0	460000	0	0	0	0	0	Yes	1	1	0	Cow
Panchur_9	1270	6	440000	10000	0	0	0	0	Yes	1	0	0
Ekeshwar_10	1678	0	320000	0	100000	30000	110000	0	Yes	2	2	0	Goats
Kilvas_11	1408	7	760000	0	0	0	0	1	Yes	3	2	1	Cow
Sundrai_12	1408	0	470000	0	0	0	0	0	Yes	3	2	0	Cow
Kodgi_13	1270	0	610000	0	10000	100000	50000	2	Yes	1	2	2	Calf
Gwad_14	1781	6	500000	0	0	240000	10000	2	Yes	3	4	2	Goats
Chulla_15	1548	5	170000	0	420000	160000	10000	2	Yes	4	2	2	Goats
Chaubatta_16	1723	5	60000	0	190000	190000	310000	0	Yes	3	4	0	Goats
Budesu	1809	5	210000	0	80000	260000	210000	1	No	2	4	1	Goats
Ratkoti	1548	6	270000	230000	240000	0	20000	2	No	1	4	2	Goats
Okhliyon	1904	6	50000	0	190000	90000	440000	2	No	3	2	2	Goats
Devalgarh	1147	7	770000	0	0	0	0	2	No	4	2	2	Goats
Pokhari	1417	0	660000	0	0	100000	0	1	No	2	3	1	Cow
Kodgi	1573	7	640000	0	10000	80000	0	5	No	5	10	5	Goats
Buakhaal	0	8	290000	0	80000	300000	110000	1	No	4	2	1	Cow
Jagsyakhal	1855	7	550000	0	40000	170000	0	0	No	4	2	0	Calf
Anantpur	1570	6	520000	0	0	190000	0	2	No	2	3	2	Cow
Latibo	1736	0	520000	0	10000	150000	60000	3	No	3	1	3	Goats
Marda Talli	0	7	300000	30000	60000	290000	90000	2	No	2	1	2	Calf
Ghartoli	0	7	770000	0	0	0	0	2	No	1	0	2	Cows
Melchauri	0	7	430000	0	30000	90000	50000	2	No	0	0	2	Cows
Patal	0	0	530000	20000	80000	0	140000	3	No	3	1	3	Goats
Nishni	1496	0	590000	10000	10000	120000	0	0	No	1	1	0	Cow
Markhola	0	7	620000	0	0	140000	0	1	No	1	1	1	Cow
Dharkot	0	6	620000	140000	10000	0	0	2	No	1	1	2	Goats

## Sheet: Locs_villages
Village	Latitude	Longitude	Deterrent
Maletha_1	29.9333	78.8252	Yes
Maletha_2	29.9358	78.8247	Yes
Maletha_3	29.936	78.8314	Yes
Ucchakot_4	29.9357	78.8131	Yes
Ucchakot_5	29.9476	78.8115	Yes
Ucchakot_6	29.9487	78.8124	Yes
Panchur_7	30.0143	78.8546	Yes
Panchur_8	30.012	78.8573	Yes
Panchur_9	30.0159	78.8596	Yes
Ekeshwar_10	29.9529	78.8151	Yes
Kilvas_11	29.9554	78.8945	Yes
Sundrai_12	29.9542	78.8902	Yes
Kodgi_13	30.1734	78.851	Yes
Gwad_14	30.1772	78.8655	Yes
Chulla_15	30.141	78.8881	Yes
Chaubatta_16	30.1717	78.8564	Yes
Budesu	30.1838	78.8827	No
Ratkoti	30.1376	78.8992	No
Okhliyon	30.1607	78.8432	No
Devalgarh	30.2303	78.8532	No
Pokhari	30.2	78.882	No
Kodgi	30.1825	78.857	No
Buakhaal	30.1217	78.8128	No
Jagsyakhal	29.9681	78.8928	No
Anantpur	29.975	78.915	No
Latibo	29.9574	78.8683	No
Marda Talli	29.9225	78.8661	No
Ghartoli	29.9322	78.8672	No
Melchauri	30.1686	78.8504	No
Patal	29.9443	78.8114	No
Nishni	30.1542	78.8945	No
Markhola	30.1855	78.8529	No
Dharkot	30.0221	78.774	No

## Sheet: 50_m radii
Village	Deterrent	Altitude (m)	Number of household	Number of people	Enclosure_Type	Number of livestock	Number of domestic guard dogs	Livestock killed in forest	Livestock killed shed	Proportion of herb cover	Proportion of scrub cover	Proportion of tree cover	Proportion of baren land cover	Livestock killed during day	Livestock killed during night	Type of livestock
Maletha_1	Yes	1558	5	21	2	24	0	1	0	10	55	15	20	0	1	Calf
Maletha_2	Yes	1552	7	15	2	11	0	2	0	10	55	20	15	2	0	Goats
Maletha_3	Yes	1569	8	16	2	6	0	1	0	20	50	20	10	0	1	Calf
Ucchakot_4	Yes	1493	6	15	2	95	0	2	1	15	65	15	5	2	0	Goats
Ucchakot_5	Yes	1452	6	16	2	32	0	1	0	15	65	15	5	0	1	Cow
Ucchakot_6	Yes	1474	8	14	2	13	2	1	0	10	60	20	10	0	1	Cow
Panchur_7	Yes	1530	3	16	2	18	0	2	0	15	65	10	10	2	0	Goats
Panchur_8	Yes	1560	8	10	2	11	0	1	0	20	55	15	10	1	0	Cow
Panchur_9	Yes	1527	6	11	2	11	0	0	0	5	5	10	80	0	0
Ekeshwar_10	Yes	1603	3	15	2	14	0	2	0	5	80	10	5	2	0	Goats
Kilvas_11	Yes	1368	7	14	2	14	3	2	1	10	60	20	10	2	1	Cow
Sundrai_12	Yes	1415	5	16	2	26	0	2	0	55	10	20	15	2	0	Cow
Kodgi_13	Yes	1566	5	9	2	3	1	2	2	10	60	25	5	2	2	Calf
Gwad_14	Yes	1690	6	15	2	23	1	6	0	20	40	30	10	4	2	Goats
Chulla_15	Yes	1261	8	9	2	11	1	4	0	10	70	10	10	2	2	Goats
Chaubatta_16	Yes	1886	6	30	2	8	2	4	0	5	10	30	55	4	0	Goats
Budesu	No	1609	7	20	2	13	1	5	0	10	40	30	10	4	1	Goats
Ratkoti	No	1313	8	24	2	20	1	6	0	20	30	40	10	4	2	Goats
Okhliyon	No	1993	5	18	2	21	2	4	0	20	30	45	15	2	2	Goats
Devalgarh	No	1086	1	5	2	6	0	3	0	15	35	40	10	2	2	Goats
Pokhari	No	1442	8	22	2	12	1	4	0	20	30	10	40	3	1	Cow
Kodgi	No	1819	6	23	1	12	3	15	1	15	60	20	5	10	5	Goats
Buakhaal	No	1823	10	21	1	12	4	2	1	5	25	20	50	2	1	Cow
Jagsyakhal	No	1601	5	14	1	71	3	2	0	15	45	30	10	2	0	Calf
Anantpur	No	1595	13	13	2	38	3	3	2	20	40	25	15	3	2	Cow
Latibo	No	1440	7	20	1	50	2	4	0	20	55	15	10	1	3	Goats
Marda Talli	No	1442	6	16	1	22	3	3	0	10	65	20	5	1	2	Calf
Ghartoli	No	1573	9	19	1	16	2	2	0	10	60	20	10	0	2	Cows
Melchauri	No	1610	12	22	1	35	0	2	0	30	40	15	15	0	2	Cows
Patal	No	1375	18	28	1	120	1	3	0	30	30	20	20	1	3	Goats
Nishni	No	1427	7	28	1	43	1	1	0	10	50	10	20	1	0	Cow
Markhola	No	1435	11	21	1	14	1	2	0	15	55	10	20	1	1	Cow
Dharkot	No	1524	10	23	2	34	0	3	0	10	30	30	30	1	2	Goats
